# Supplementary material for: Mobil Monitoring Doppler Ultrasound (MoMDUS) study: protocol for a prospective, observational study investigating the use of artificial intelligence and low-cost Doppler ultrasound for the automated quantification of hypertension, pre-eclampsia and fetal growth restriction in rural Guatemala
Source: PubMed Central journal article supplement — BMJ Open. 2024 Sep 10;14(9):e090503. doi: 10.1136/bmjopen-2024-090503 (PMC11409237; doi:10.1136/bmjopen-2024-090503), 2024-09-10
Supplement: bmjopen-2024-090503.reviewer_comments.pdf [file bmjopen-2024-090503.reviewer_comments.pdf]

## PEER REVIEW HISTORY

BMJ Open publishes all reviews undertaken for accepted manuscripts. Reviewers are asked to complete a checklist review form (<http://bmjopen.bmj.com/site/about/resources/checklist.pdf>) and are provided with free text boxes to elaborate on their assessment. These free text comments are reproduced below.

## ARTICLE DETAILS

|                            |                                                                                                                                                                                                                                                                                                          |
|----------------------------|----------------------------------------------------------------------------------------------------------------------------------------------------------------------------------------------------------------------------------------------------------------------------------------------------------|
| <b>TITLE (PROVISIONAL)</b> | The Mobil Monitoring Doppler Ultrasound (MOMDUS) Study: Protocol for a prospective, observational study investigating the use of artificial intelligence and low-cost Doppler ultrasound for the automated quantification of hypertension, preeclampsia, and fetal growth restriction in rural Guatemala |
| <b>AUTHORS</b>             | Ramos, Edlyn; Piló Palax, Irma; Serech Cuxil, Emily; Sebaquijay Iquic, Elsa; Canú Ajqui, Ana; Miller, Ann; Chandrasekeran, Suchitra; Hall-Clifford, Rachel; Sameni, Reza; Katebi, Nasim; Clifford, Gari; Rohloff, Peter                                                                                  |

This article was not externally reviewed at BMJ Open. Protocols that have been independently assessed prior to submission to BMJ Open are usually fast-tracked to publication on the grounds that further substantial changes will not be possible. This independent assessment will usually be external, independent review for both a substantial grant award from a non-commercial or government funder and ethics approval.
